# Supplementary material for: Design and synthesis of luminescent porous coordination polymers for chromaticity modulation, sensing of nitrobenzene and iodine encapsulation
Source: Royal Society of Chemistry journal article supplement (doi:10.1039/c6ce00960c), 2016-01-01
Supplement: c6ce00960c1.pdf [file c6ce00960c1.pdf]

**Electronic Supplementary Information (ESI)**

**Design and Synthesis of Luminescent Porous Coordination  
Polymers for Chromaticity Modulation, Sensing Nitrobenzene  
and Iodine Encapsulation**

Haijun Wang,<sup>a</sup> Fujun Cheng,<sup>a</sup> Changchang Zou,<sup>a</sup> Qianqian Li,<sup>a</sup> Yinying Hua,<sup>a</sup> Jingui Duan,<sup>\*  
abc</sup> and Wanqin Jin<sup>\* a</sup>

<sup>a</sup> State Key Laboratory of Materials-Oriented Chemical Engineering, College of Chemistry and Chemical engineering, Nanjing Tech University, Nanjing, 210009, China. Email: duanjingui@njtech.edu.cn; wqjin@njtech.edu.cn.

<sup>b</sup> State Key Laboratory of Coordination Chemistry, Nanjing University, Nanjing, 210023, China

<sup>c</sup> Jiangsu National Synergetic Innovation Center for Advanced Materials, Nanjing Tech University, Nanjing, 210009, China

## Materials and methods

All the reagents and solvents were commercially available and used as received. The elemental analysis was carried out with a Perkin-Elmer 240C elemental analyzer. The FTIR spectra were recorded from KBr pellets in the range of 4000-500  $\text{cm}^{-1}$  on a VECTOR 22 spectrometer. Thermal analyses were performed on a TGA, STA 209 F1, NETZSCH Instruments from room temperature to 650°C with a heating rate of 10°C/min under flowing nitrogen. The powder X-ray diffraction patterns (PXRD) measurements were carried on a Bruker axS D8 Advance 40kV, 40mA for  $\text{CuK}\alpha$  ( $\theta = 1.5418 \text{ \AA}$ ) with a scan rate of 0.2 s/deg at room temperature. Luminescent spectra of the solid samples were recorded on a Hitachi 850 fluorescence spectrophotometer. The fluorescence lifetime was measured using an Edinburgh Instruments FLS920 Fluorescence Spectrometer.

## Synthesis of ligands

The ligand of Biphenyl-3,4',5-tricarboxylic acid (Bi- $\text{H}_3\text{L}$ ) was commercially available and used as received.

The ligand of [1,1':4',1''-terphenyl]-3,4'',5-tricarboxylic acid (Te- $\text{H}_3\text{L}$ ) was synthesized according to our previous work<sup>1</sup>.

The ligand of [1,1':4',1'';4'',1''']-quaterphenyl-3,4''',5-tricarboxylic acid (Qu- $\text{H}_3\text{L}$ ) was synthesized by the Suzuki reactions between 4-(4,4,5,5-Tetramethyl-[1,3,2]dioxaborolan-2-yl)-[1,1':4',1'']terphenyl-4''-carboxylic acid methyl ester (2) and dimethyl 5-bromoisophthalate followed by the base-catalyzed hydrolysis (Scheme 1).

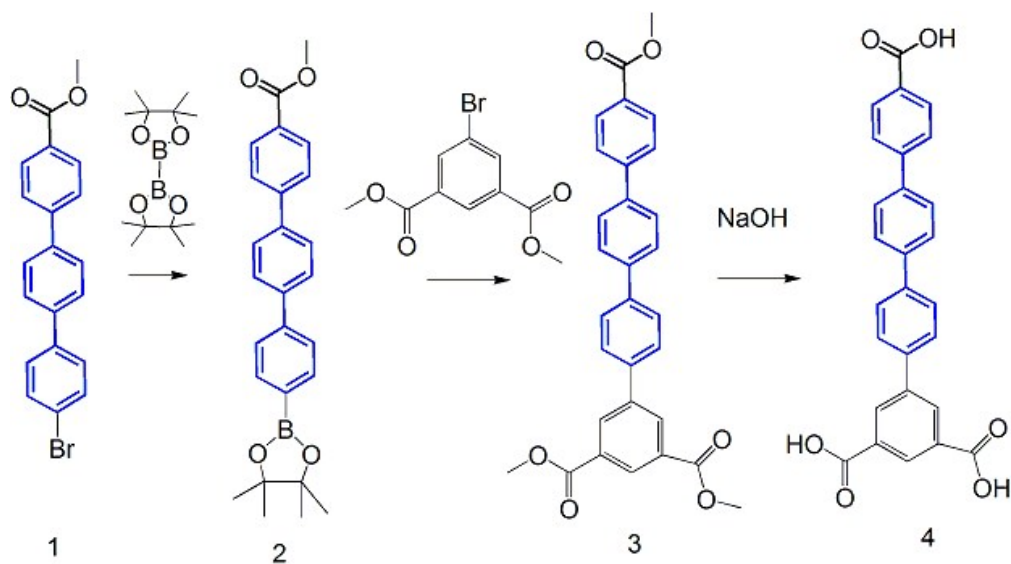

Scheme S1 Synthesis route of Qu-H<sub>3</sub>L

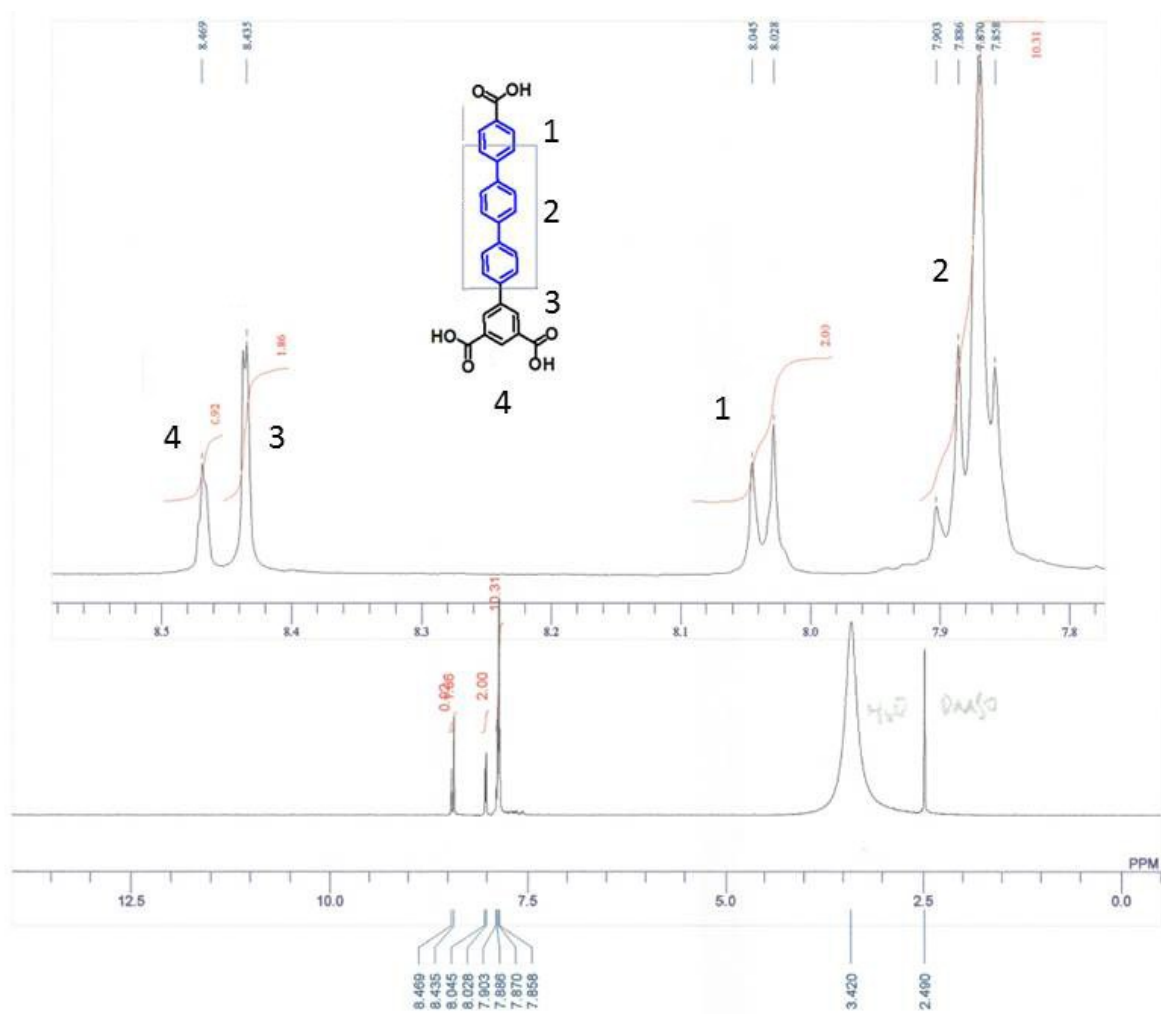

Figure S1 The <sup>1</sup>H NMR of Qu-H<sub>3</sub>L

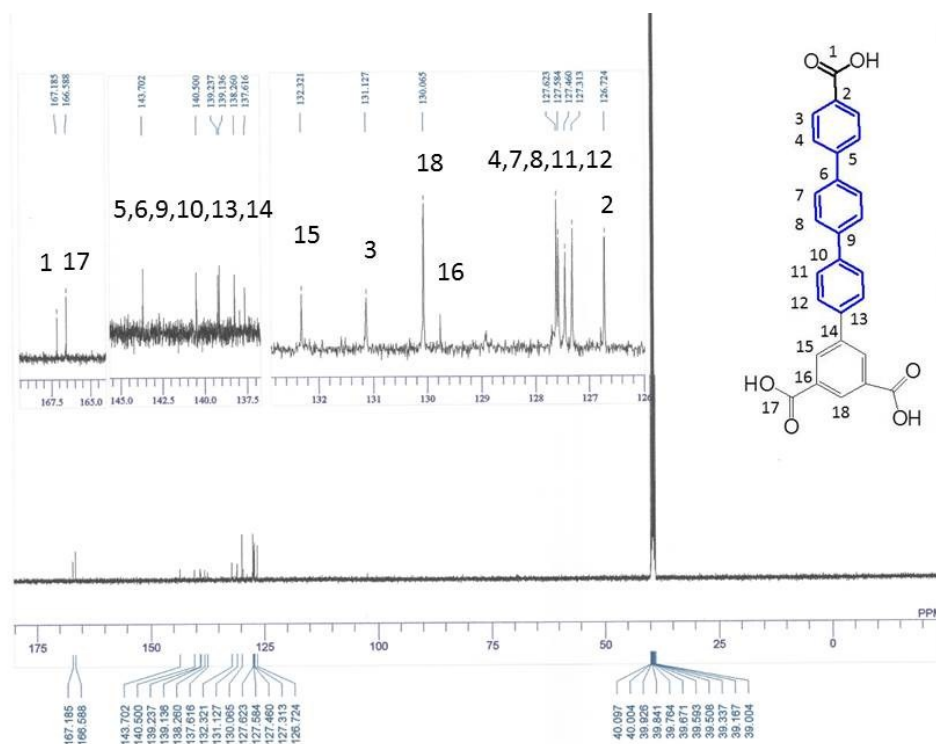

Figure S2 The  $^{13}\text{C}$  NMR of Qu-H<sub>3</sub>L

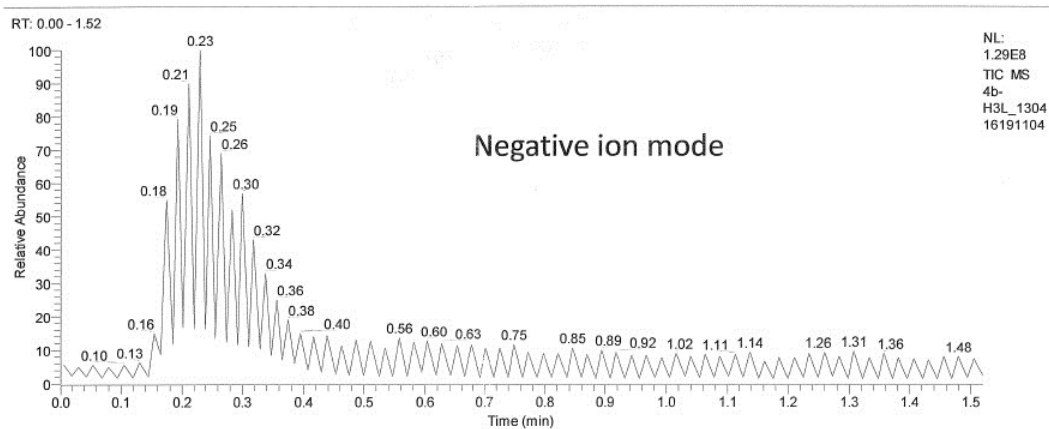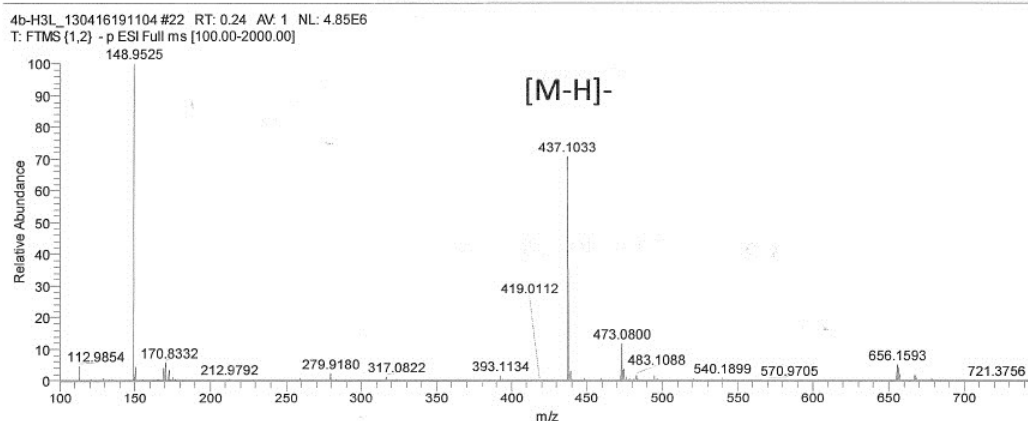

Figure S3 The Mass spectra of Qu-H<sub>3</sub>L (The molecular weight of Qu-H<sub>3</sub>L is 438)

## Crystallographic Analyses

Single-crystal X-ray diffraction data were measured on a Bruker Smart Apex CCD diffractometer at 293 K using graphite monochromated Mo/K $\alpha$  radiation ( $\lambda = 0.71073 \text{ \AA}$ ). Data reduction was made with the Bruker Saint program. The structures were solved by direct methods and refined with full-matrix least squares technique using the SHELXTL package.<sup>2</sup> Non-hydrogen atoms were refined with anisotropic displacement parameters during the final cycles. Organic hydrogen atoms were placed in calculated positions with isotropic displacement parameters set to  $1.2 \times U_{eq}$  of the attached atom. The hydrogen atoms of the ligand and water molecules could not be located, but are included in the formula. The unit cell includes a large region of disordered solvent molecules, which could not be modeled as discrete atomic sites. We employed PLATON/SQUEEZE<sup>3,4</sup> to calculate the diffraction contribution of the solvent molecules and, thereby, to produce a set of solvent-free diffraction intensities; structures were then refined again using the data generated. CCDC 1400342-1400344 contains the supplementary crystallographic data for this paper. These data can be obtained free of charge from The Cambridge Crystallographic Data Centre via [www.ccdc.cam.ac.uk/data\\_request/cif](http://www.ccdc.cam.ac.uk/data_request/cif).

## Sample activation

For BET experiments, solvent-exchanged sample was prepared by immersing as-synthesized samples in fresh DMF (one day) for removing residual ligand and metal ions. Then, DMF was exchanged by dry EtOH for 3 days. The completely activated sample was obtained by heating EtOH-exchanged sample at 120 °C under a dynamic high vacuum for 48 hours.

For sensing experiments: EtOH exchanged samples were then soaked in Hexane for 3 day. The extraction was decanted every 10 hours and fresh Hexane was replaced. The hexane exchanged samples were used for sensing benzene derivatives.

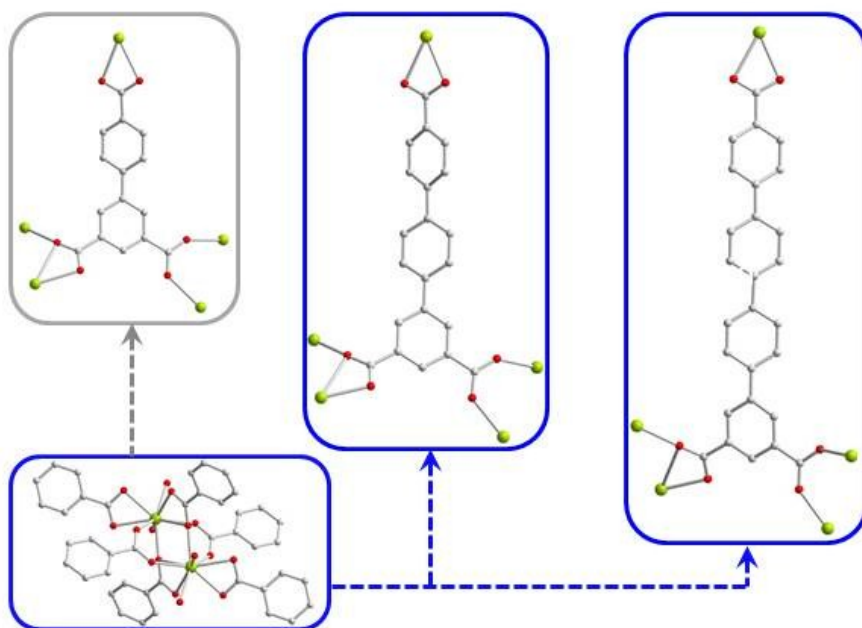

**Figure S4** The connections of involved ligands and Ln-Ln clusters in La(Bi-L) and NTU-5 to NTU-10.

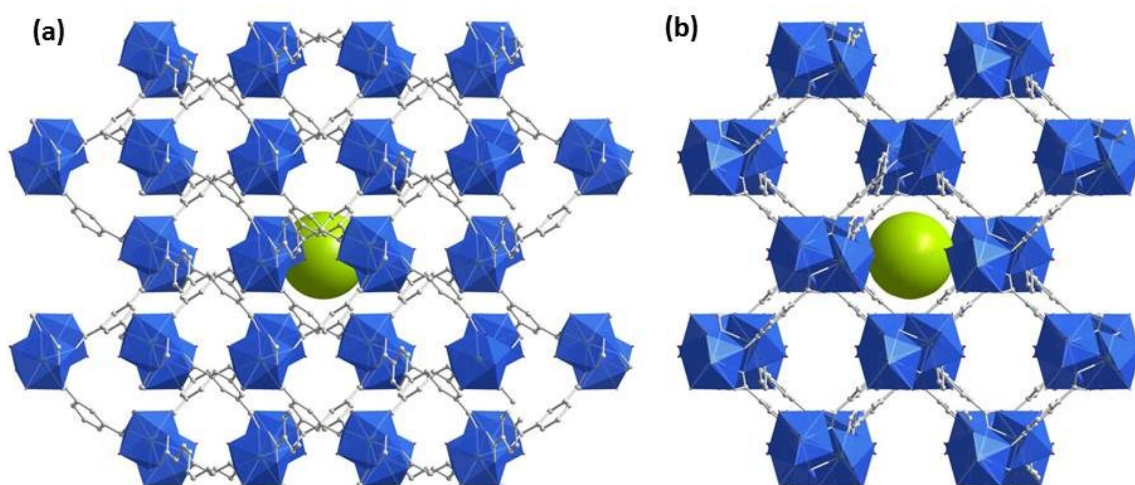

**Figure S5** Packing view of La(Bi-L) along  $a$  axis (a) and its 1D quadrilateral nanotube (b).

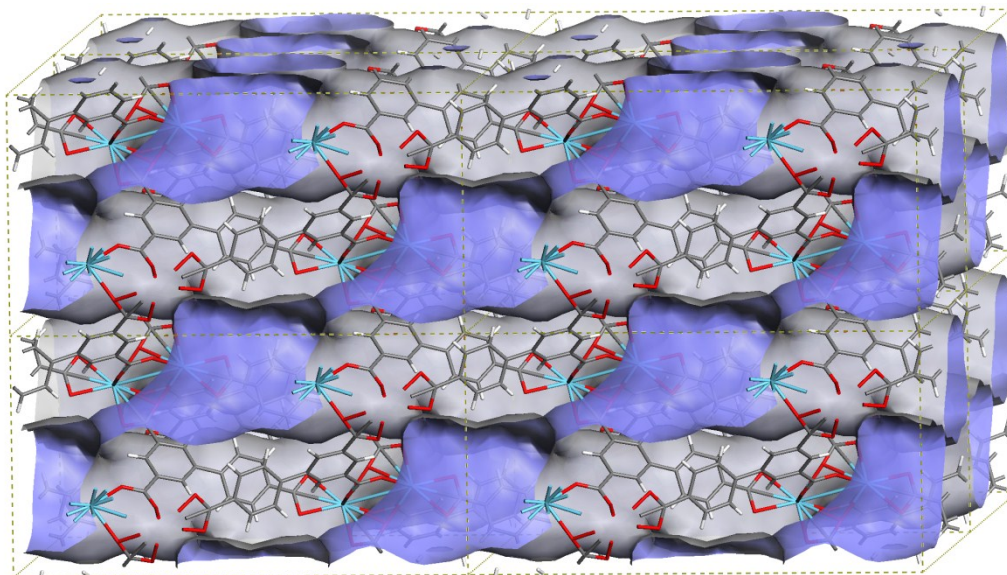

**Figure S6** The Connolly surface diagram showing uniform channels in La(Bi-L) (Inner surfaces: purple, outer surfaces: grey).

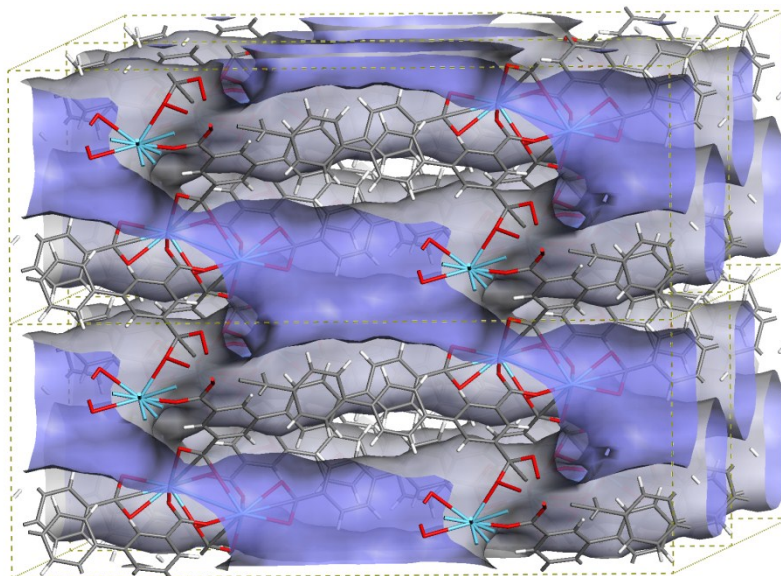

**Figure S7** The Connolly surface diagram showing uniform channels in NTU-6 (Inner surfaces: purple, outer surfaces: grey).

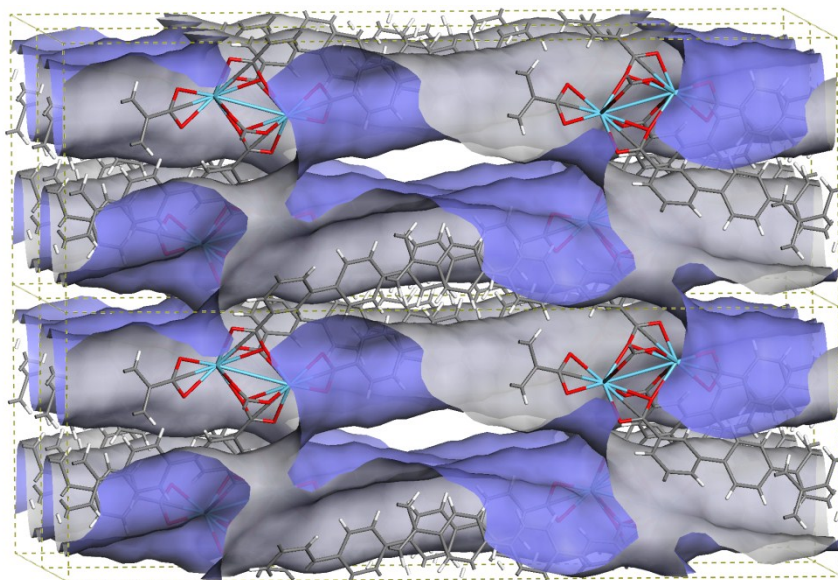

**Figure S8** The Connolly surface diagram showing uniform channels in NTU-9. (Inner surfaces: purple, outer surfaces: grey).

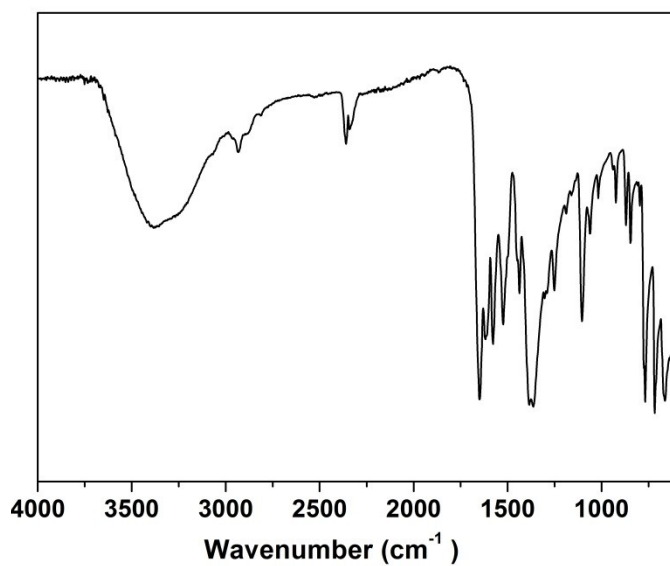

**Figure S9** IR of La(Bi-L).



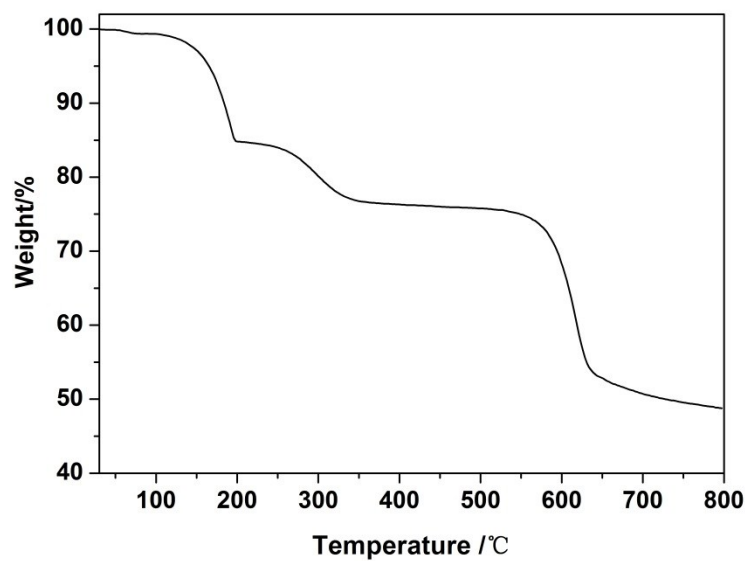

**Figure S10** TG of La(Bi-L).

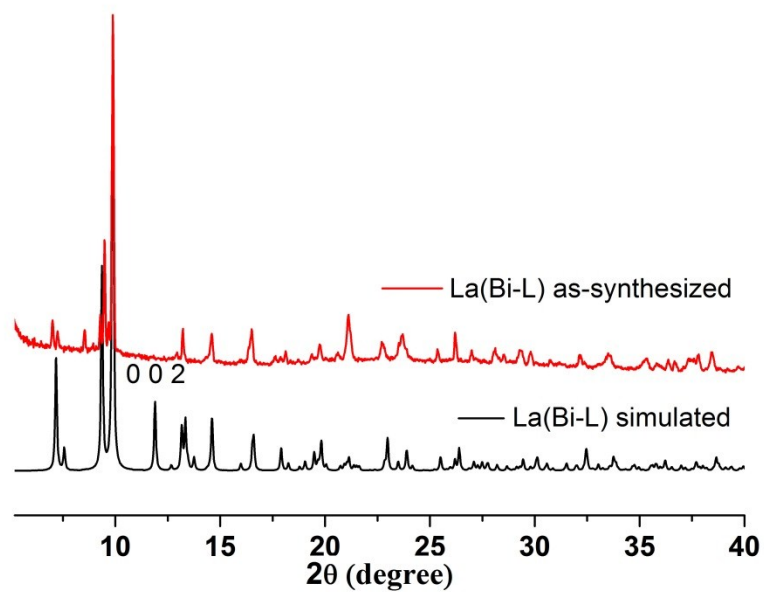

**Figure S11** PXRD of La(Bi-L). Not preferred orientation of crystal growth result in peak absence at (0 0 2) crystal surface.

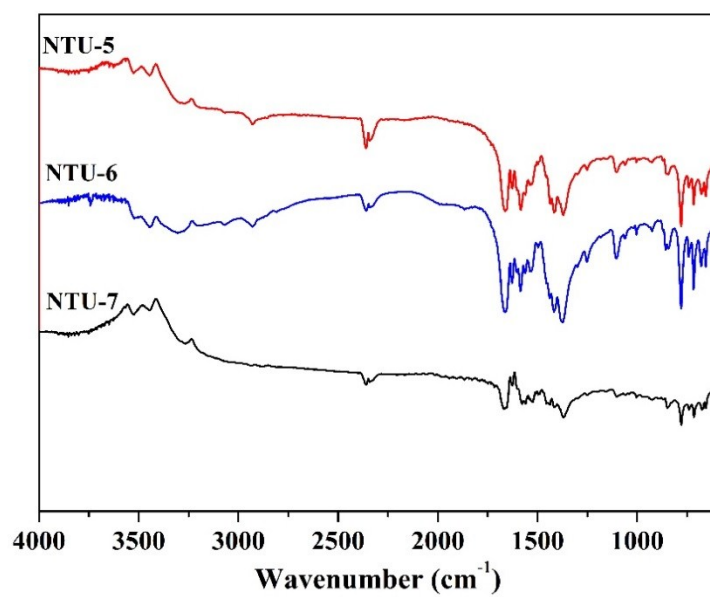

Figure S12 IR of NTU-5, NTU-6 and NTU-7.

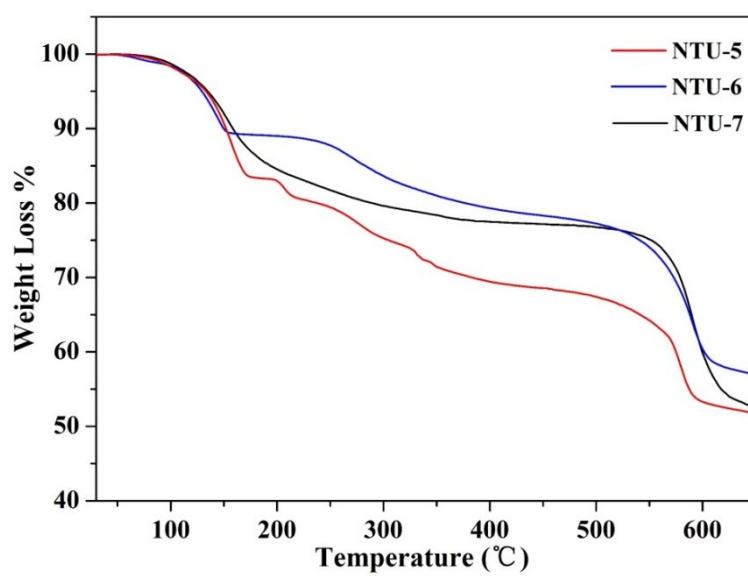

Figure S13 TG of NTU-5, NTU-6 and NTU-7

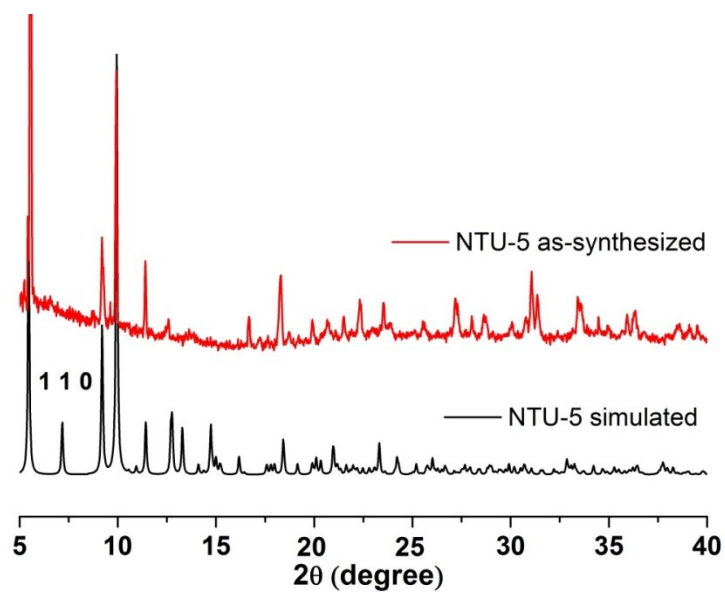

**Figure S14** PXRD of NTU-5. Not preferred orientation of crystal growth result in peak absence at (1 1 0) crystal surface.

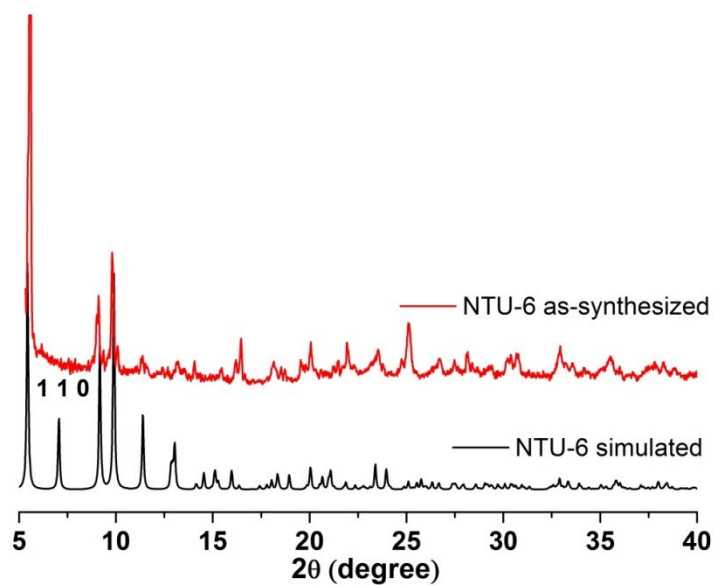

**Figure S15** PXRD of NTU-6. Not preferred orientation of crystal growth result in peak absence at (1 1 0) crystal surface.

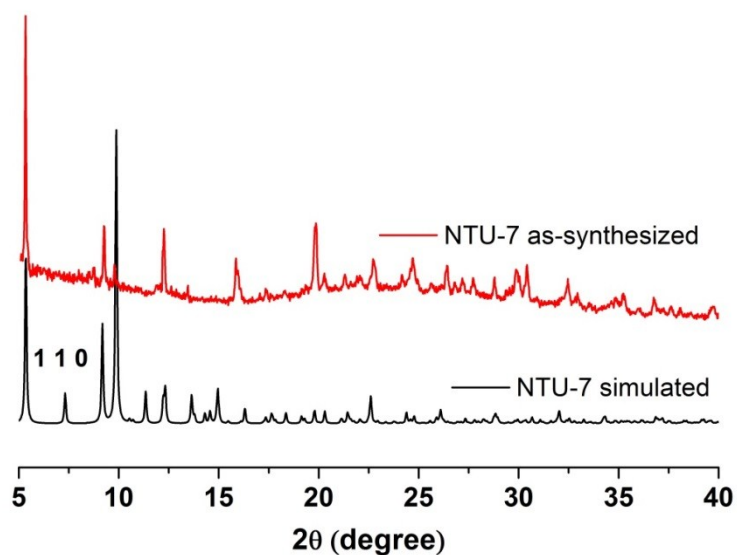

**Figure S16** PXR D of NTU-7. Not preferred orientation of crystal growth result in peak absence at (1 1 0) crystal surface.

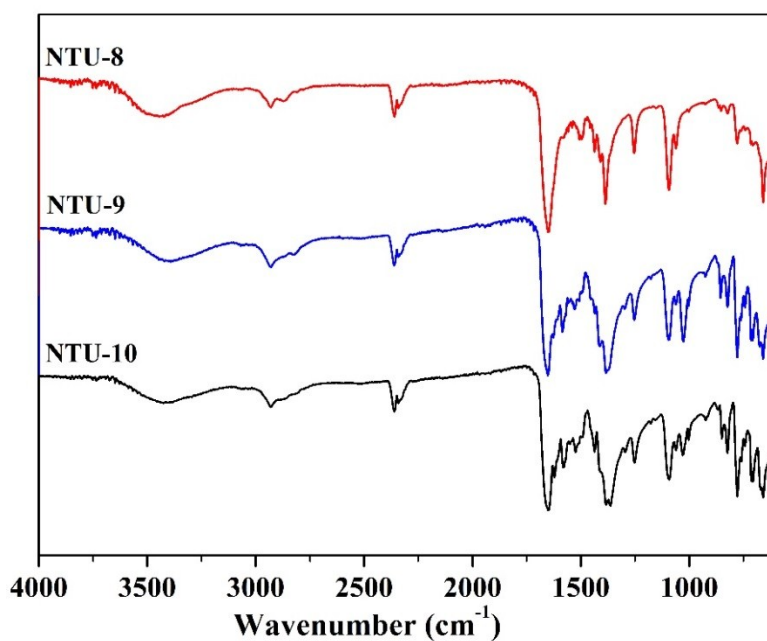

**Figure S17** IR of NTU-8, NTU-9 and NTU-10.

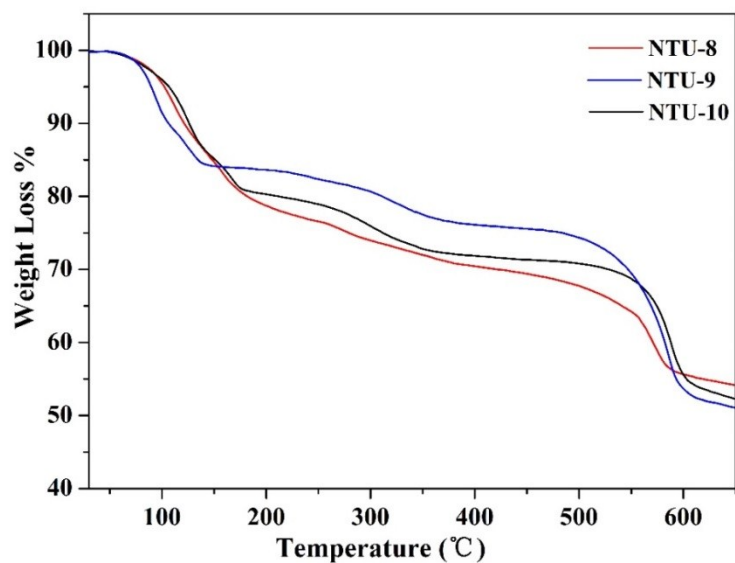

Figure S18 TG of NTU-5, NTU-6 and NTU-7

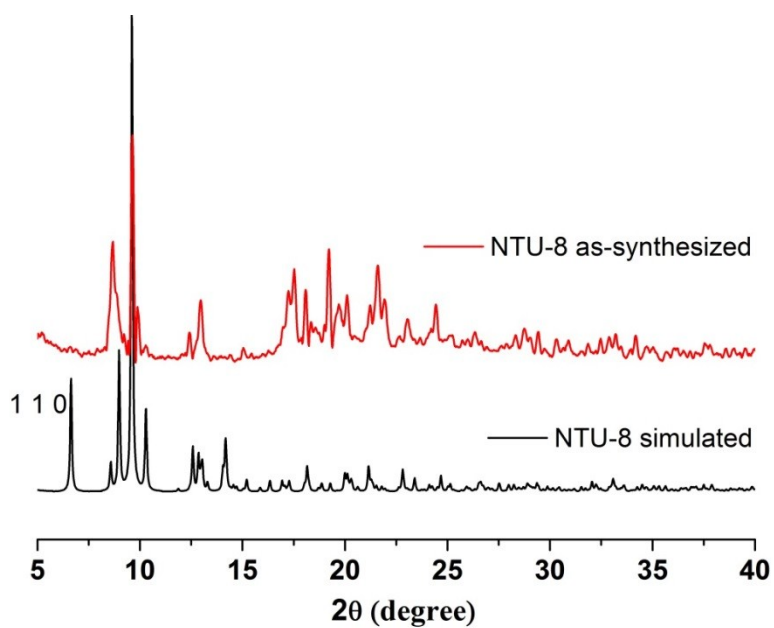

Figure S19 PXRD of NTU-8. Not preferred orientation of crystal growth result in peak absence at (1 1 0) crystal surface.

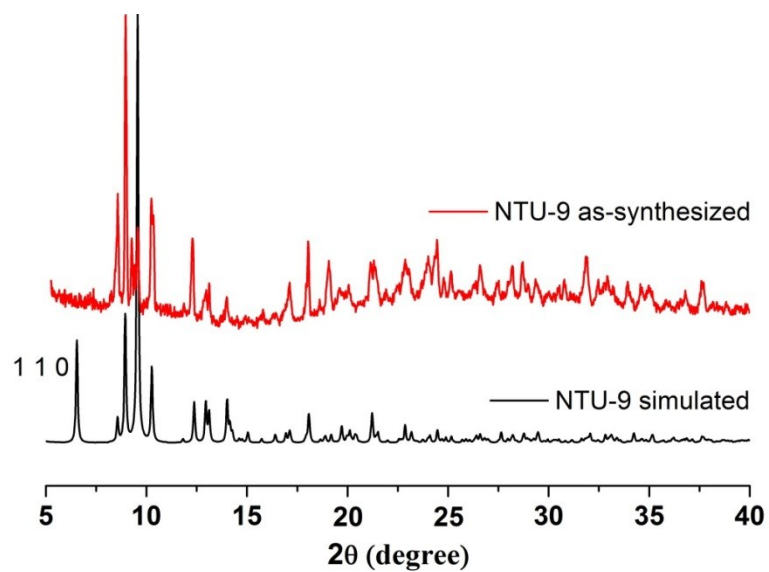

**Figure S20** PXRD of NTU-9. Not preferred orientation of crystal growth result in peak absence at (1 1 0) crystal surface.

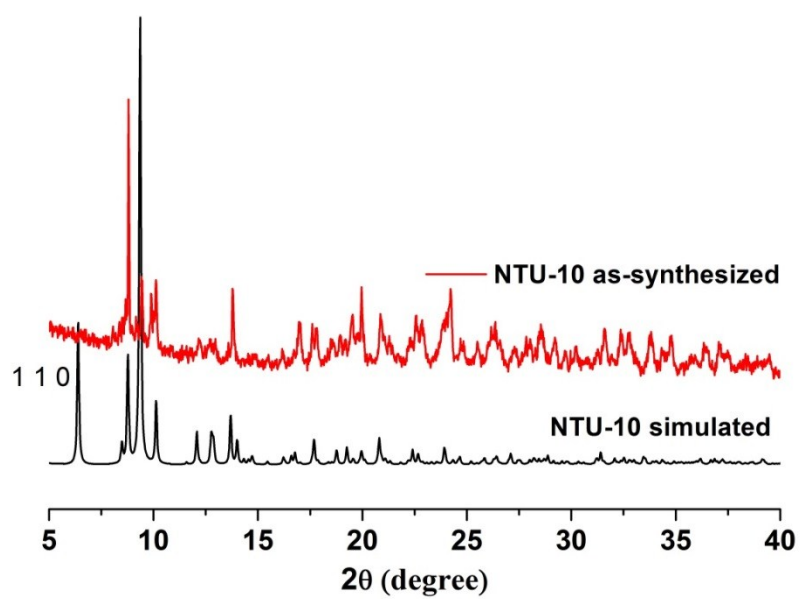

**Figure S21** PXRD of NTU-10. Not preferred orientation of crystal growth result in peak absence at (1 1 0) crystal surface.

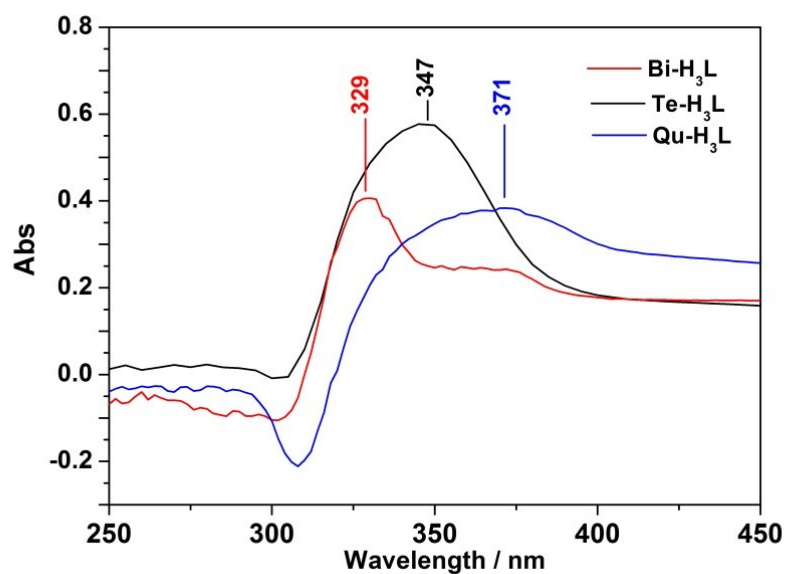

Figure S22 UV absorption spectra of three ligands at solid state.

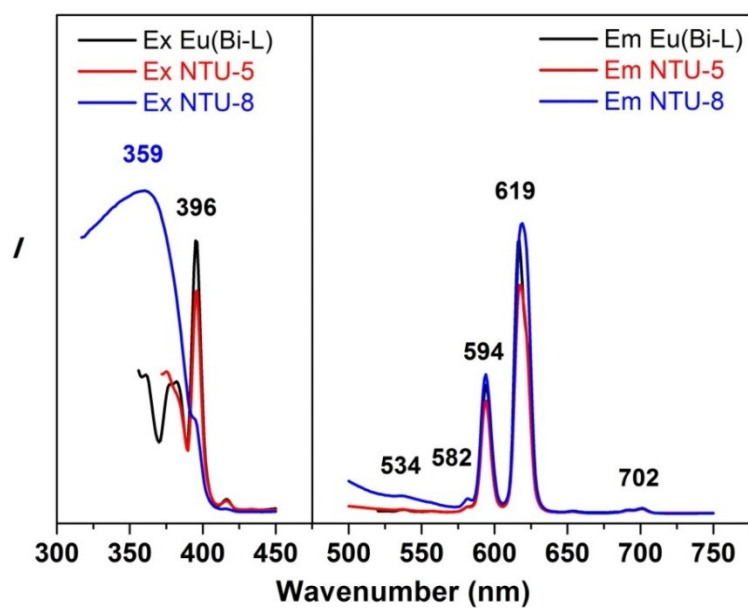

Figure S23 Luminescent spectra of Eu(Bi-L), NTU-5 and NTU-8 in solid state at room temperature

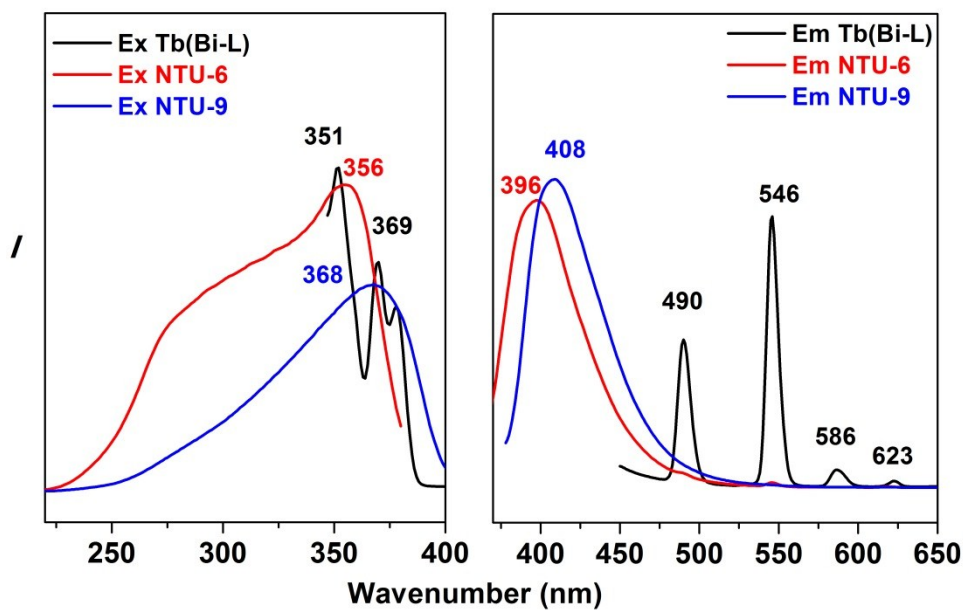

**Figure S24** Luminescent spectra of Tb(Bi-L), NTU-6 and NTU-9 in solid state at room temperature.

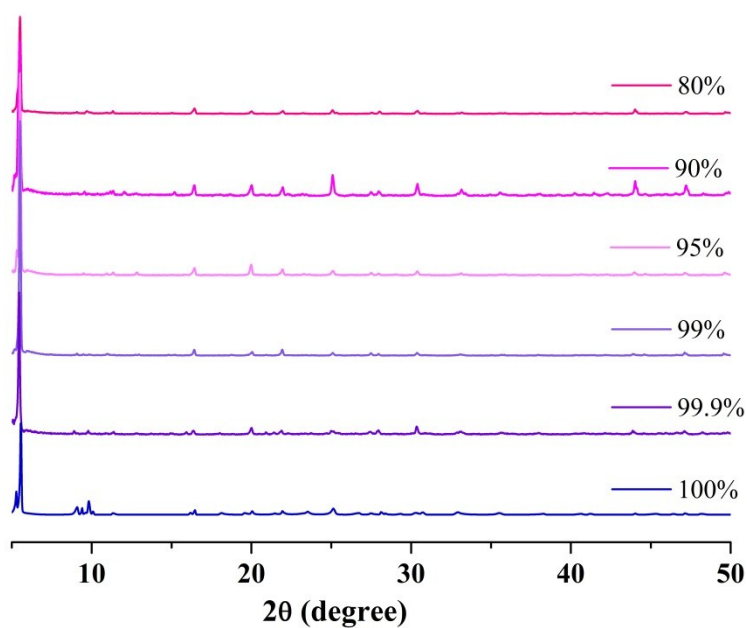

**Figure S25** PXRD patterns of series Eu/Tb(Te-L) with varied molar ratio of Eu/Tb ions.



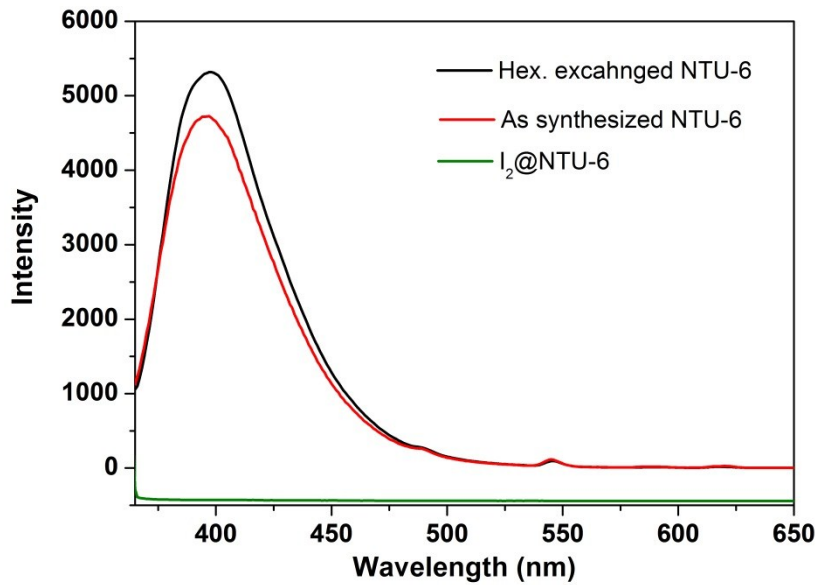

**Figure S26** Luminescent spectra of hexane exchanged NTU-6, as synthesized NTU-6 and I<sub>2</sub>@NTU-6 in solid state at room temperature.

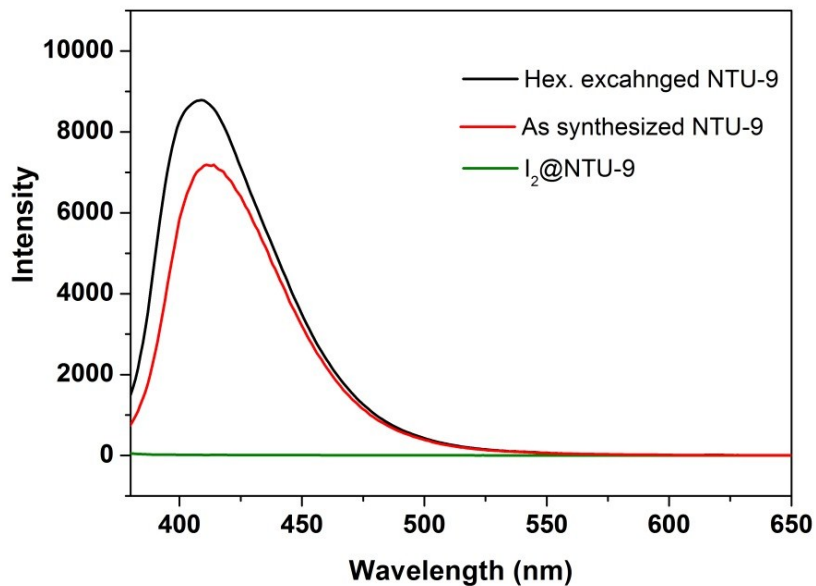

**Figure S27** Luminescent spectra of hexane exchanged NTU-9, as synthesized NTU-9 and I<sub>2</sub>@NTU-9 in solid state at room temperature.

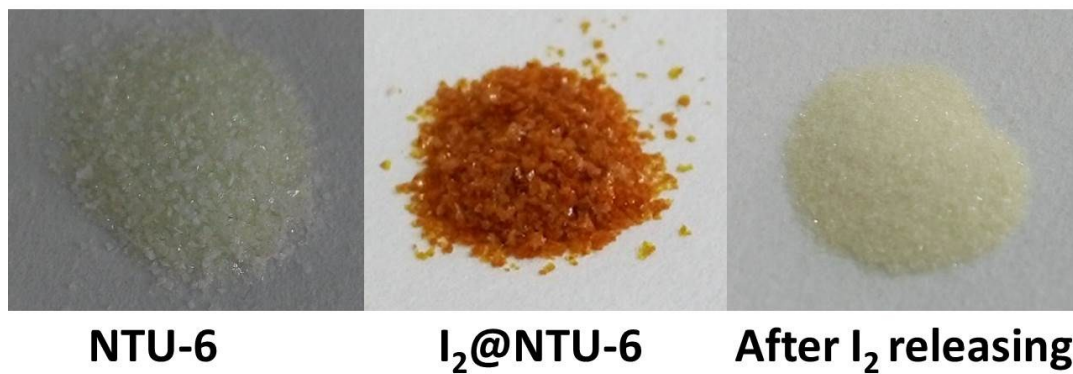

**Figure S28** Color change of NTU-6 crystals before and after I<sub>2</sub> releasing.

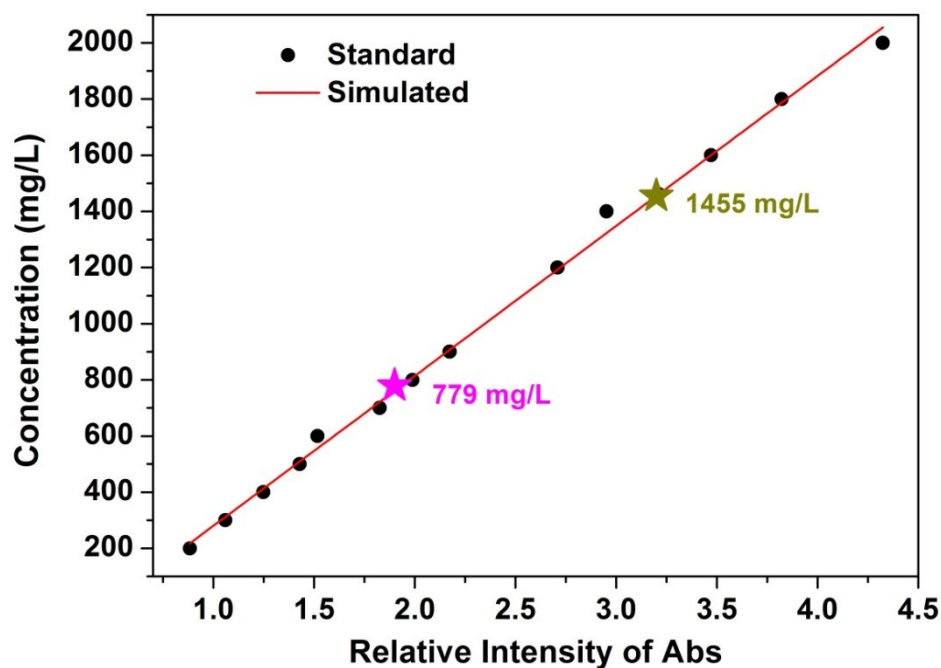

**Figure S29** The standard line of I<sub>2</sub> ethanol show very good fitness. I<sub>2</sub>@NTU-6 (20 mg) and I<sub>2</sub>@NTU-9 (14 mg) were soaked into 2 mL and 2.5 mL ethanol, respectively. About 1h later, we checked the UV-spectrum of the solution only. The intensity of the 290 nm peak locates on the standard line: yellow star for NTU-6 and red purple for NTU-9.

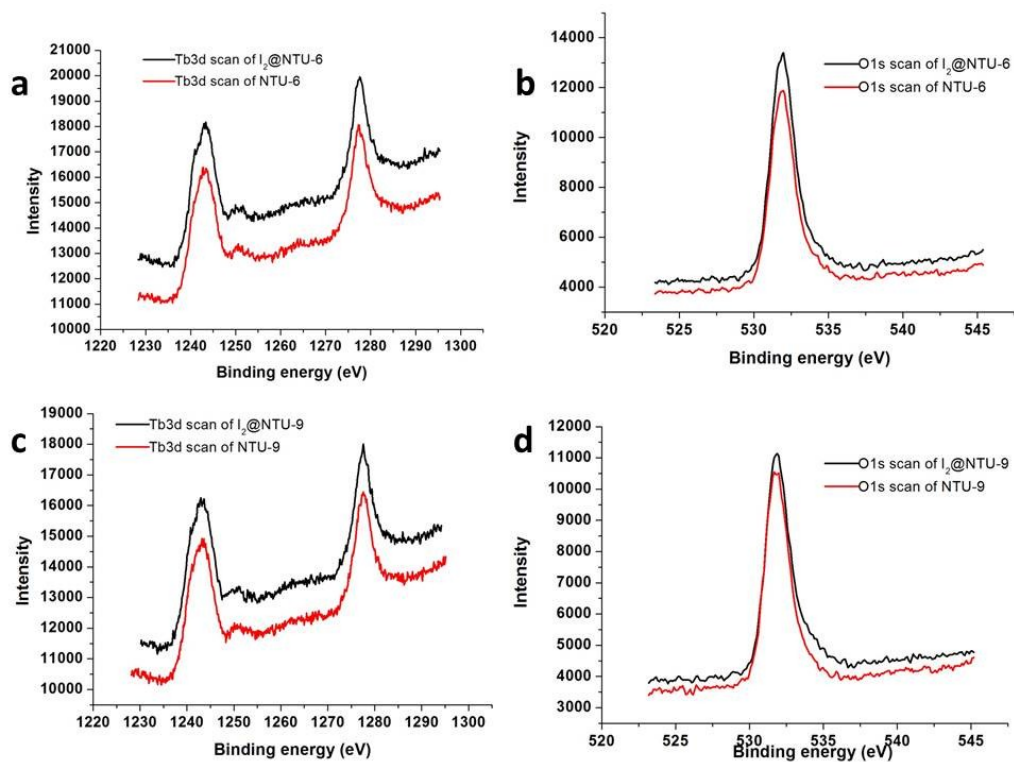

**Figure S30** Comparison of XPS of Tb3d and O1s in NTU-6, NTU-9 and their iodine encapsulated phases.

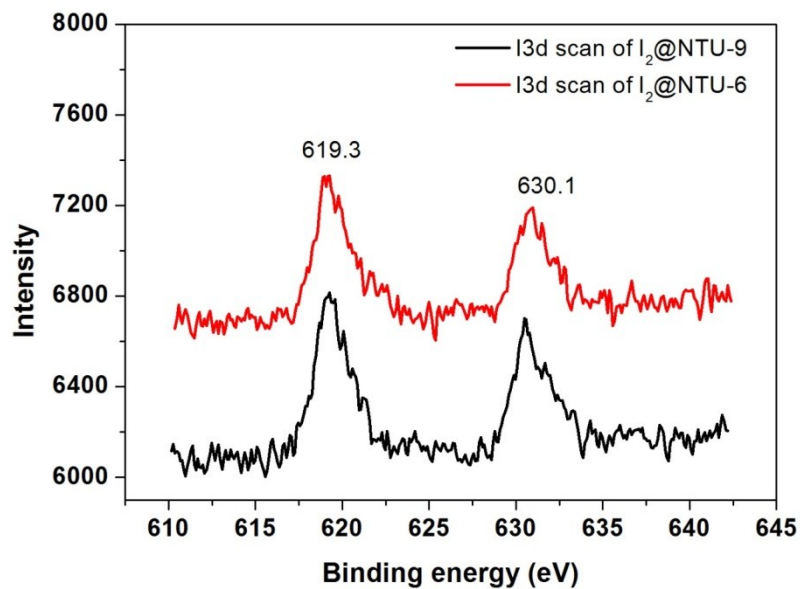

**Figure S31** XPS spectrum of I3d scan of I<sub>2</sub>@NTU-6 and I<sub>2</sub>@NTU-9.

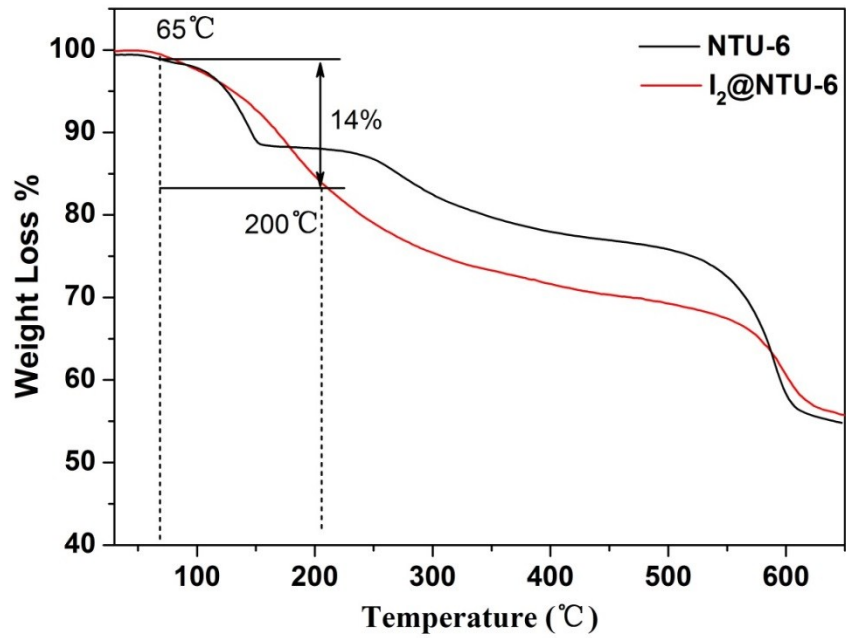

Figure S32 TG of I<sub>2</sub>@NTU-6

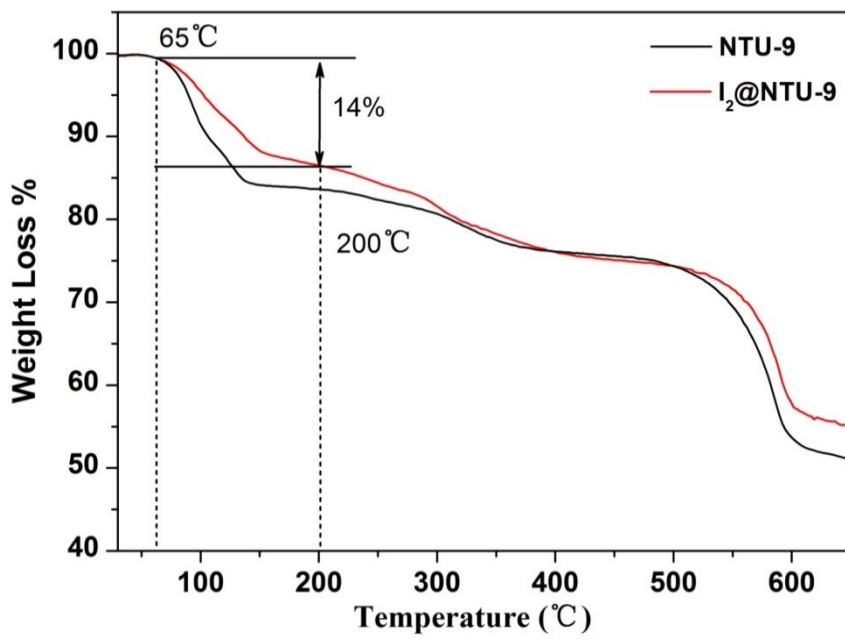

Figure S33 TG of I<sub>2</sub>@NTU-9

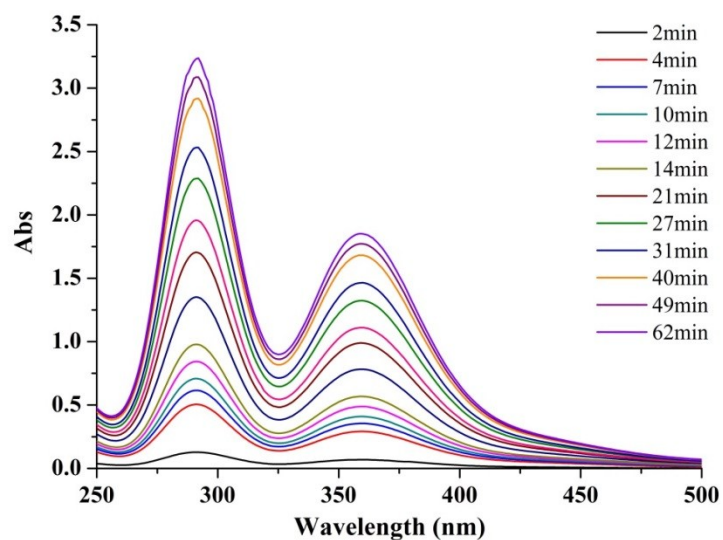

**Figure S34** UV spectra of  $I_2$  releasing from  $I_2@NTU-5$  (20 mg in 2.0 mL EtOH).

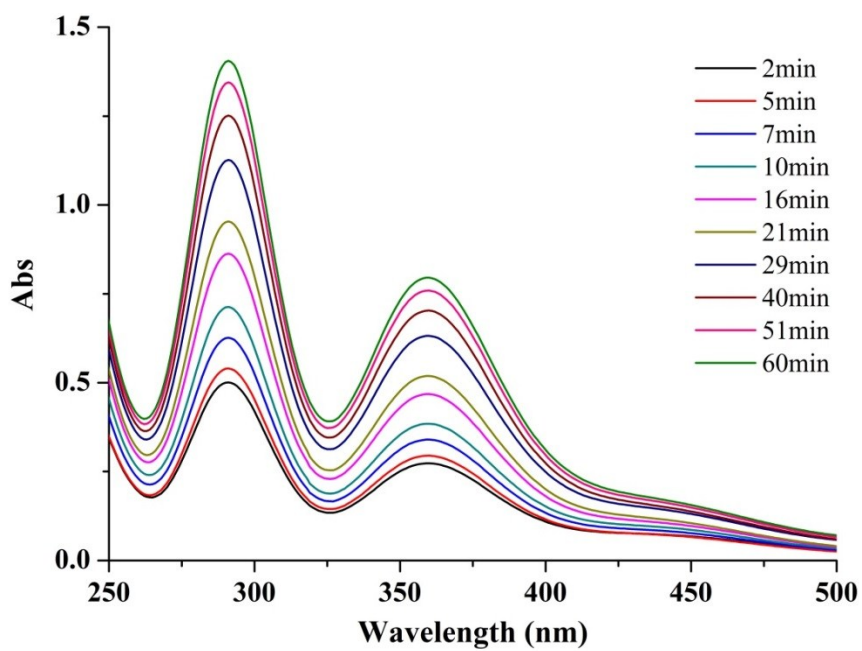

**Figure S35** UV spectra of  $I_2$  releasing from  $I_2@NTU-7$  (10 mg in 2.5 mL EtOH).

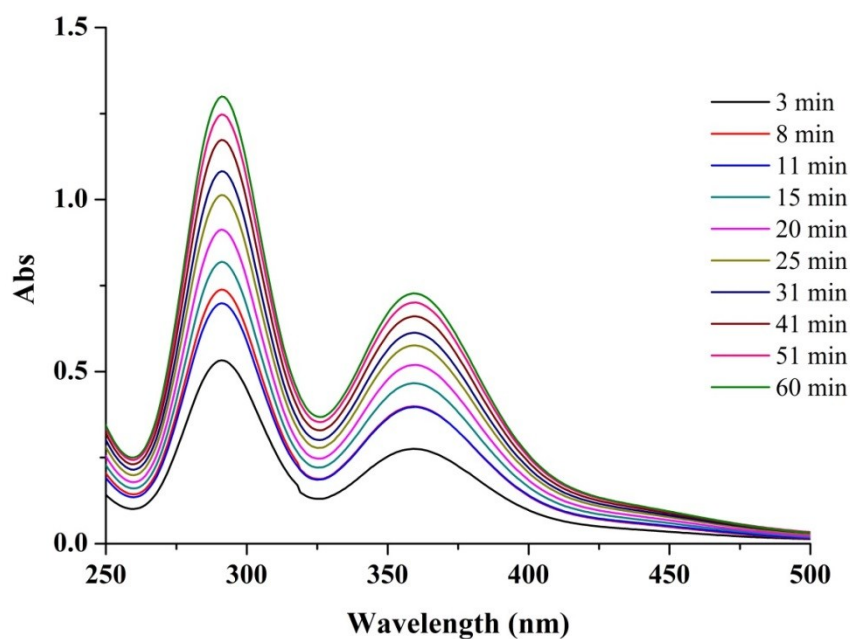

**Figure S36** UV spectra of  $I_2$  releasing from  $I_2@NTU-8$  (10 mg in 2.5 mL EtOH).

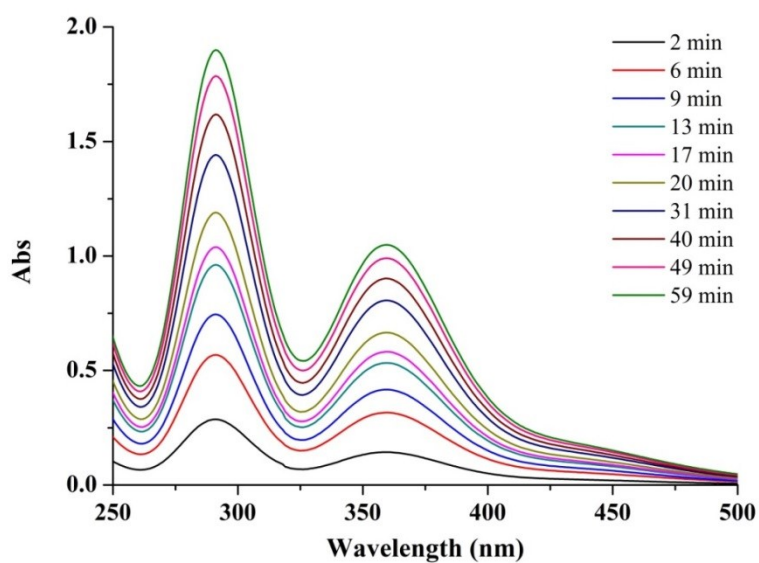

**Figure S37** UV spectra of  $I_2$  releasing from  $I_2@NTU-10$  (13 mg in 2.5 mL EtOH).

#### References

- (1) Duan, J. G.; Higuchi, M.; Kitagawa, S. *Inorg. Chem.* **2015**, *54*, 1645.
- (2) Sheldrick, G. M. *Acta Crystallogr. Sec. A* **2008**, *64*, 112.
- (3) Vandersluis, P.; Spek, A. L. *Acta Crystallogr. Sec. A* **1990**, *46*, 194.
- (4) Spek, A. L. *J. Appl. Crystallogr.* **2003**, *36*, 7.
